# Supplementary figures and images for: Are AuPdTM (T = Sc, Y and M = Al, Ga, In), Heusler Compounds Superconductors without Inversion Symmetry?
Source: MDPI journal article supplement (doi:10.3390/ma12162580), 2019-08-13

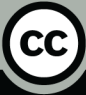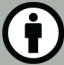

BY

Supplement: s1 [file s1]

BSF for CuNiScAl L2<sub>1</sub>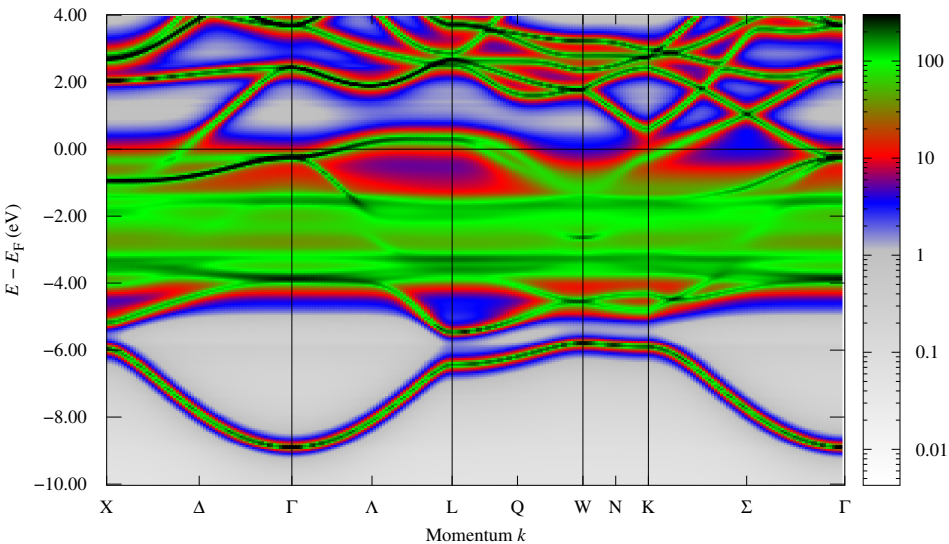

Supplement: s1 [file s1]

BSF for AuPdScAl B2

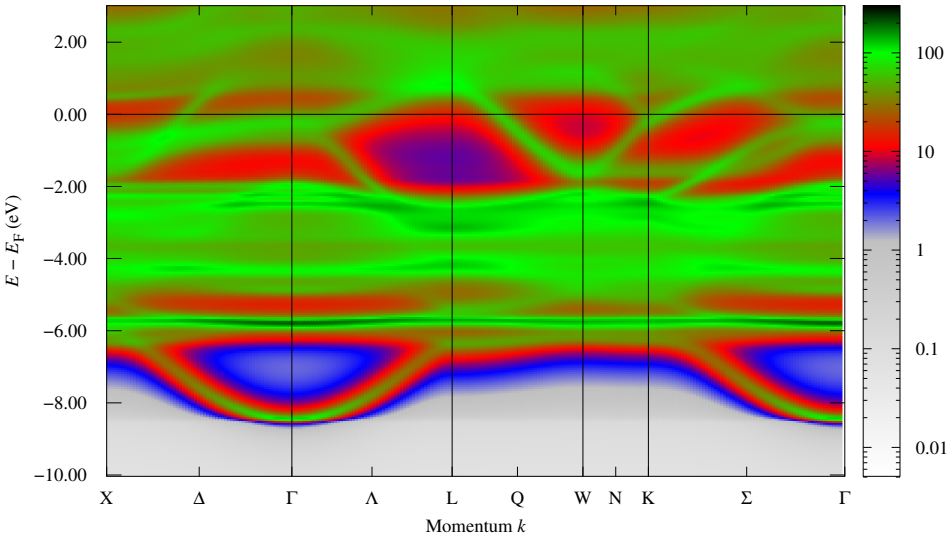

Supplement: s1 [file s1]

BSF for AuPdYIn L2<sub>1</sub>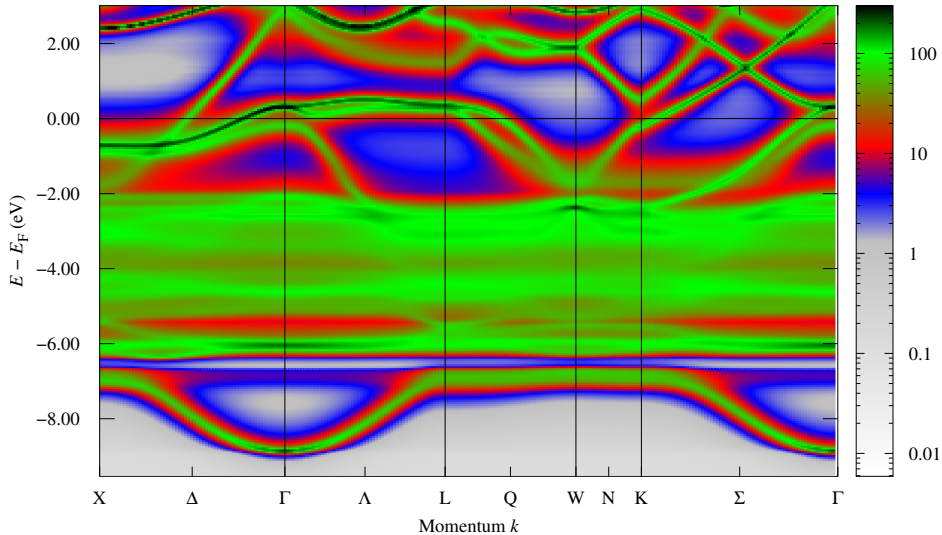

Supplement: s1 [file s1]

BSF for AuPdScAl L2<sub>1</sub>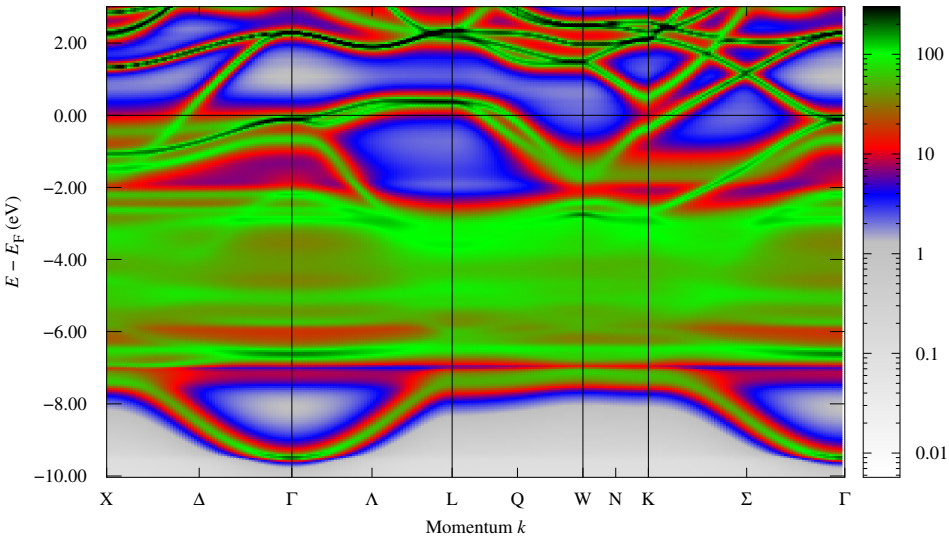

Supplement: s1 [file s1]

BSF for AuPdYAl L2<sub>1</sub>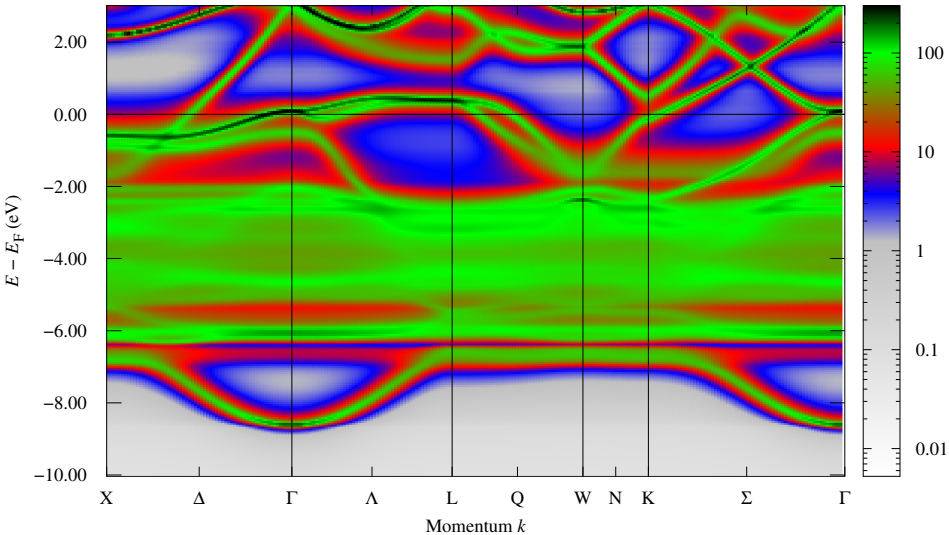

Supplement: s1 [file s1]

BSF for AuPdScAl 75% Y + 25% L2<sub>1</sub>

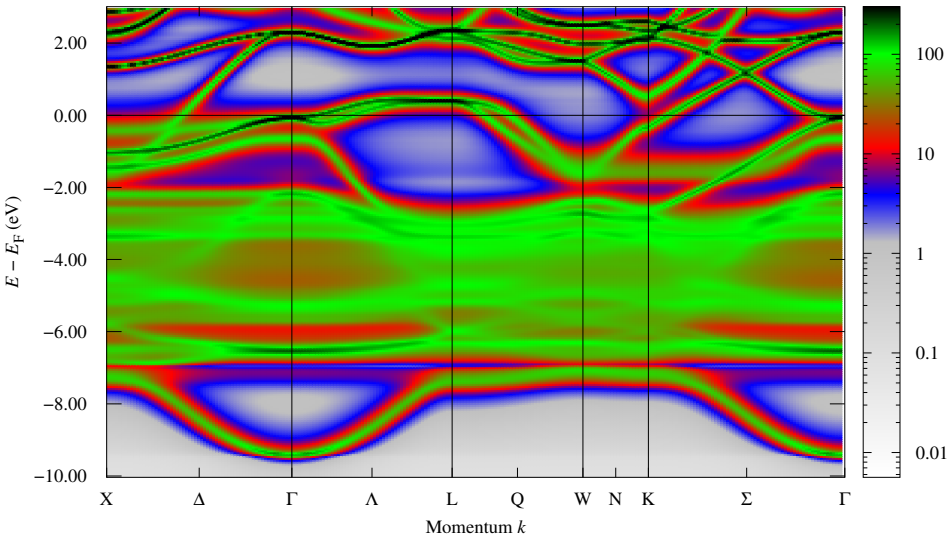

Supplement: s1 [file s1]

BSF for AuPdYIn Y

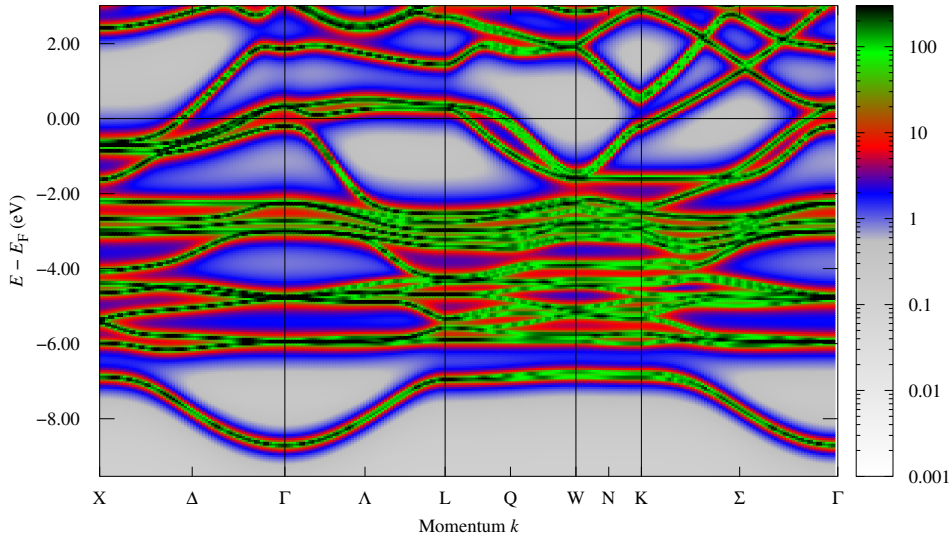

Supplement: s1 [file s1]

BSF for CuNiScAl Y

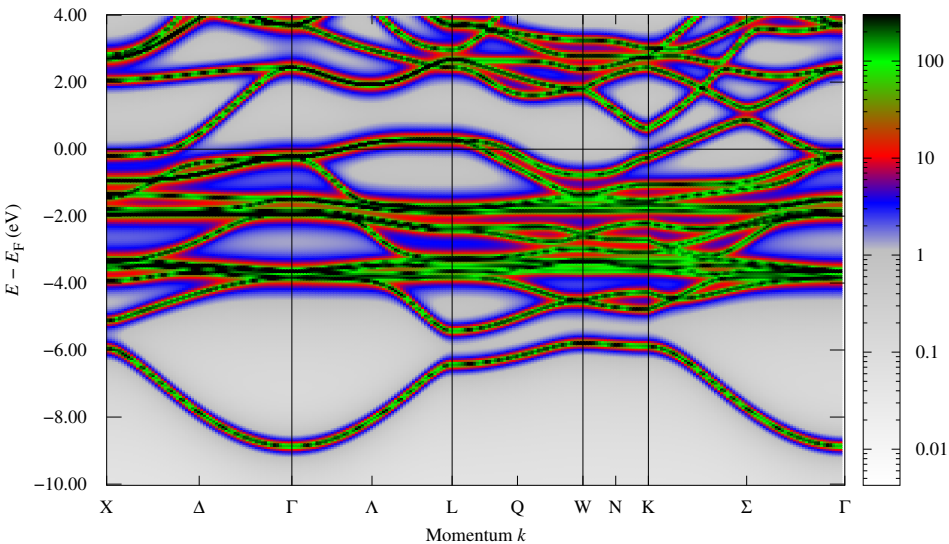

Supplement: s1 [file s1]

BSF for AgPdScAl L2<sub>1</sub>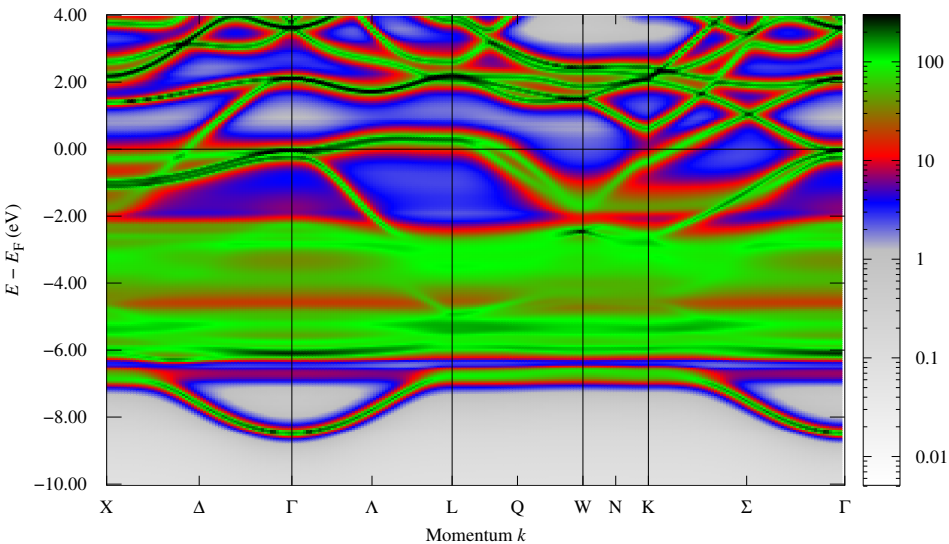

Supplement: s1 [file s1]

BSF for AuPdScGa L2<sub>1</sub>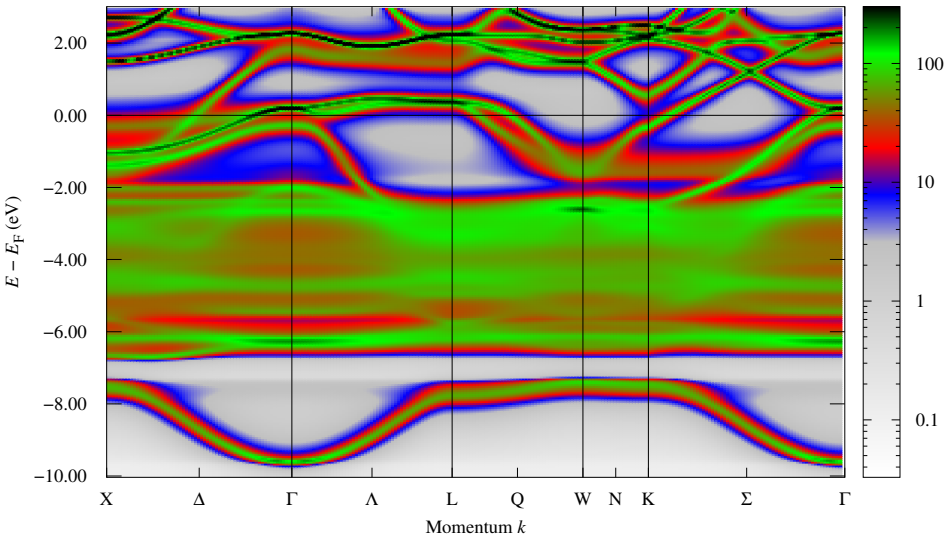

Supplement: s1 [file s1]

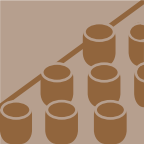

*materials*

Supplement: s1 [file s1]

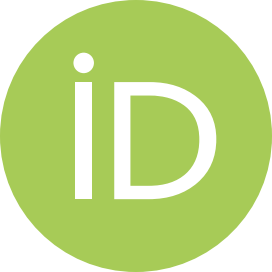

Supplement: s1 [file s1]

BSF for AuPdScAl Y

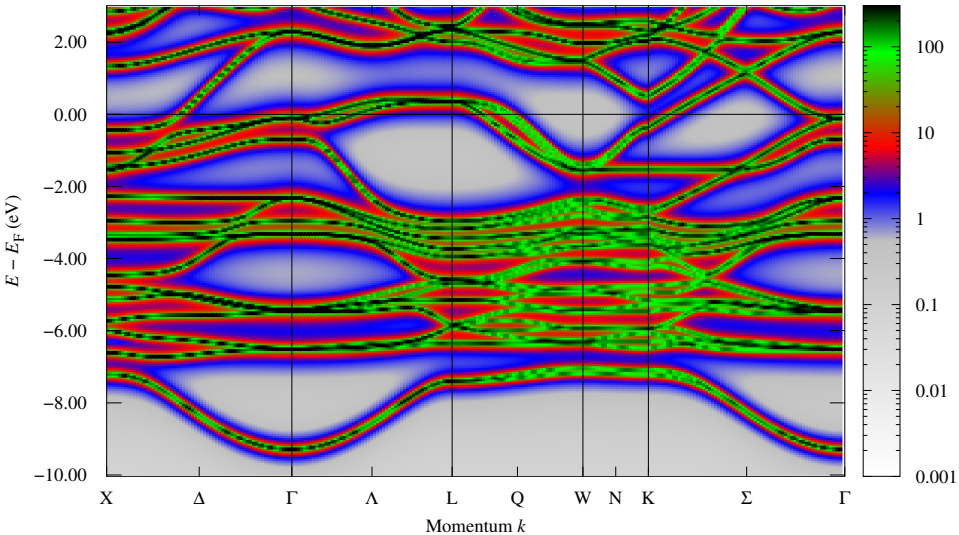

Supplement: s1 [file s1]

BSF for AuPtScIn Y

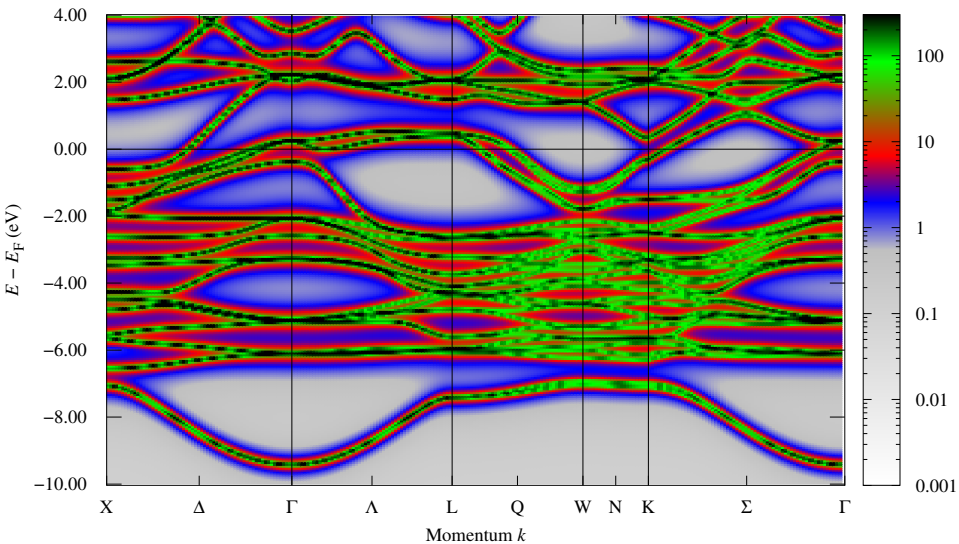

Supplement: s1 [file s1]

BSF for AuPtScIn L2<sub>1</sub>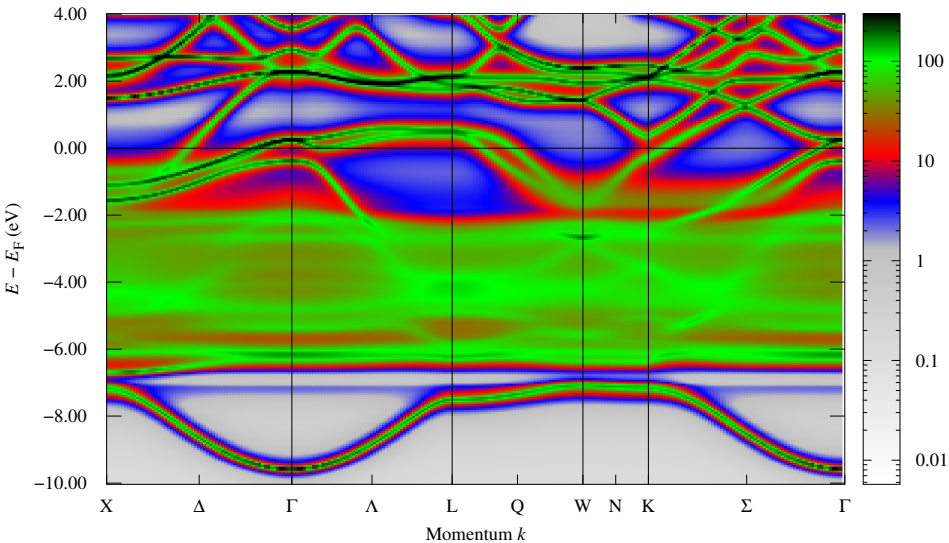

Supplement: s1 [file s1]

BSF for AuPdScIn L2<sub>1</sub>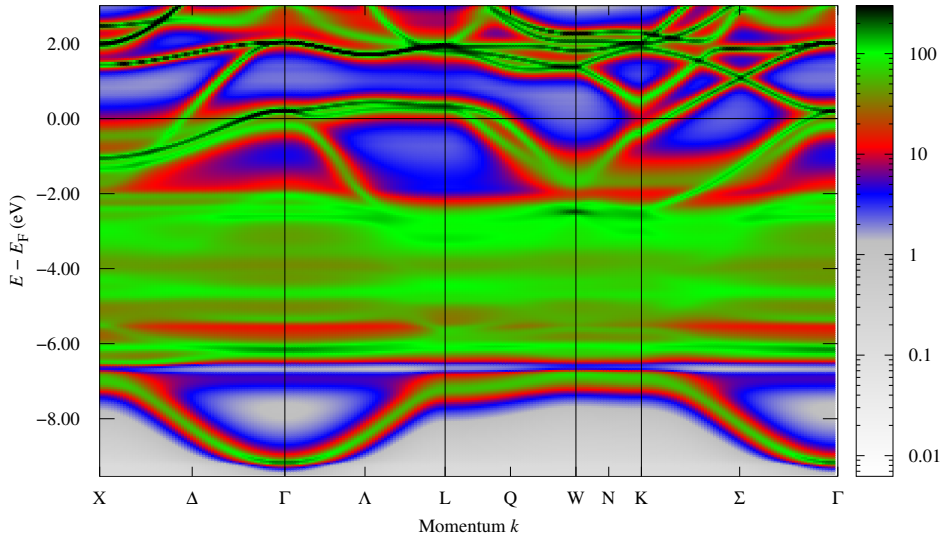

Supplement: s1 [file s1]

BSF for AgPdScAl Y

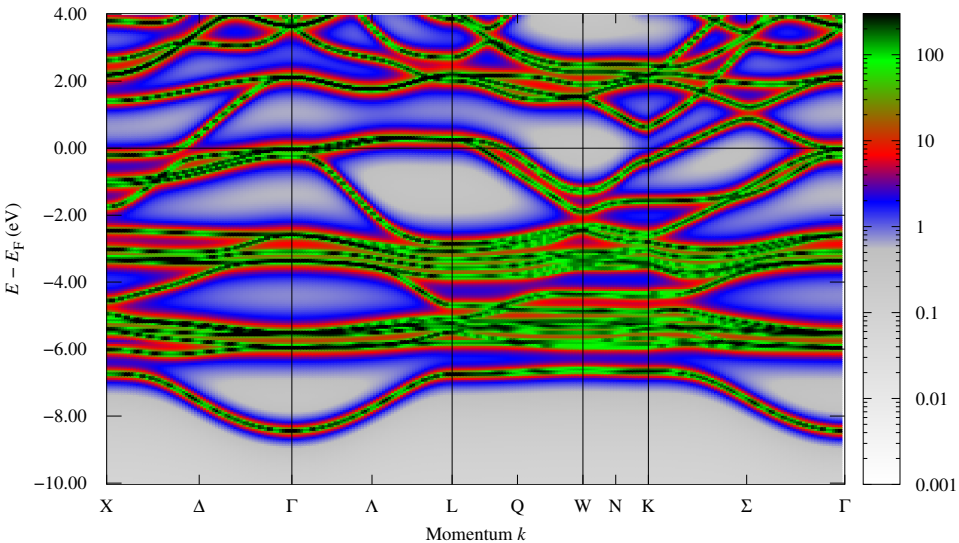

Supplement: s1 [file s1]

BSF for AuPdScGa Y

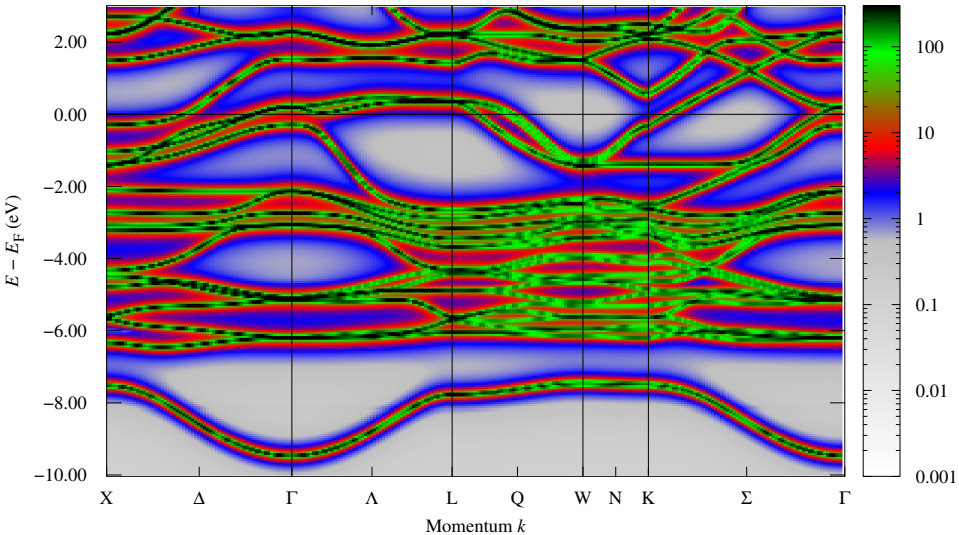

Supplement: s1 [file s1]

BSF for AuPdScIn Y

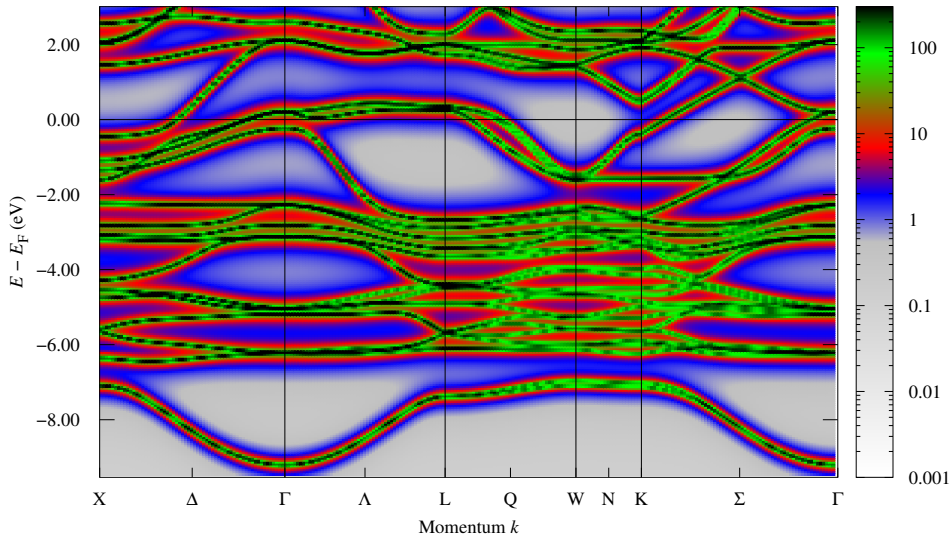

Supplement: s1 [file s1]

BSF for AuPdYAl L2<sub>1</sub>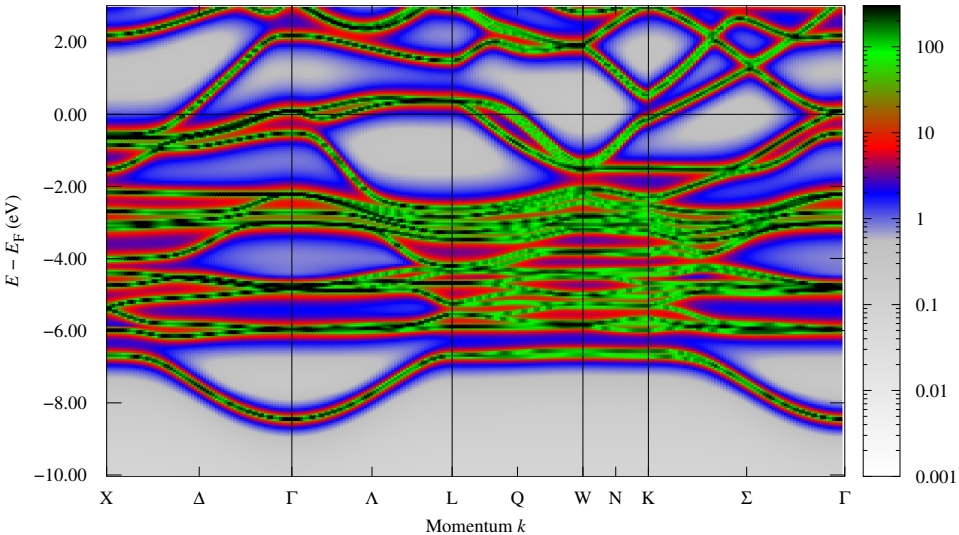

Supplement: s1 [file s1]
